# Supplementary material for: American History Websites for Use in Secondary Schools.
Source: Springer Nature journal article supplement (doi:10.1038/nrn3950), 1999-01-01
Supplement: 41583_2015_BFnrn3950_MOESM10_ESM.pdf [file 41583_2015_BFnrn3950_MOESM10_ESM.pdf]

## Supplementary information S1

### Box S1 | Strengths of the structural model

In 1991, Felleman and Van Essen proposed a hierarchical model of feedforward, lateral, and feedback connectivity between cortical regions based on visual cortex anatomy<sup>1</sup>. They classified each connection on the basis of termination site: feedforward connections were thought to terminate in mid layers (preferentially layer IV) of less differentiated visual regions (moving sequentially from primary visual cortex towards the front of the brain), whereas feedback connections were thought to predominantly avoid layer IV, terminating mostly in superficial layers of more differentiated visual regions (moving sequentially from the front of the brain towards primary visual cortex). Although the Felleman and Van Essen model is still widely used, the visual system is not an ideal prototype for building a general model of corticocortical communication because large swaths of cortex (e.g., frontal, temporal, and parietal association cortices) do not have a strict, linear posterior to anterior lamination gradient (cf.<sup>2</sup>). Even the visual system contains many violations of Felleman and Van Essen's hierarchy<sup>3</sup>.

In contrast, Barbas and colleagues' structural model for corticocortical connections, which was developed analyzing patterns of connection within the prefrontal and temporal cortices of the macaque brain<sup>4,5</sup>, does not suffer from these problems. Importantly, the structural model not only predicts the flow of information between prefrontal and temporal cortices<sup>6,7</sup> and between prefrontal and parietal areas of the macaque brain<sup>8</sup>, but it also predicts patterns of connections in visual cortices of the cat<sup>9</sup>.

The structural model better describes the flow of predictions and prediction errors across cortical areas that do not show an anterior–posterior lamination gradient in the macaque brain, which other models cannot account for<sup>10</sup>. Most hierarchical models of the cortex are predicated on some form of a distance rule, where there is a linear relation between the distance between two areas and the percentage of cells that send projections to deep layers (if feedback connections) or to superficial layers (if feedforward connections)<sup>11, p. 697</sup>. For example, the

distance rule model proposed by Kennedy and colleagues<sup>12-14</sup> was developed analyzing patterns of connection in visual areas of the monkey brain and works well for describing information flow in visual cortex because there is a relatively linear posterior to anterior laminar gradient: V1, the cortical area with the highest laminar differentiation, is located at the occipital pole and moving anteriorly visual cortex becomes increasingly less granular and more dysgranular. Therefore, in the occipital lobe, laminar differentiation and distance go in parallel. But laminar differentiation and distance do not go in parallel in the rest of the brain<sup>15</sup>. For example, in a recent paper on the distance rule model, Markov et al. excluded the prefrontal cortex from their analyses because the data did not fit their model. In a footnote to Table 6 in their paper, they stated “The prefrontal areas were excluded from the source and target list due to their tendency to overrun the distance and hierarchy rules” (pg. 243)<sup>14</sup>. The distance rule model may not be equally applicable to the entire cerebral cortex, while the structural model, by contrast, has successfully predicted patterns of connections independently of distances in frontal, temporal parietal and occipital cortices<sup>6-9</sup>.

## References

1. Felleman, D.J. & Van Essen, D.C. Distributed hierarchical processing in the primate cerebral cortex. *Cereb Cortex* **1**, 1-47 (1991).
2. Garcia-Cabezas, M.A. & Barbas, H. A direct anterior cingulate pathway to the primate primary olfactory cortex may control attention to olfaction. *Brain Struct Funct* **219**, 1735-54 (2014).
3. Hegde, J. & Felleman, D.J. Reappraising the functional implications of the primate visual anatomical hierarchy. *Neuroscientist* **13**, 416-21 (2007).
4. Barbas, H. Pattern in the laminar origin of corticocortical connections. *J Comp Neurol* **252**, 415-22 (1986).
5. Barbas, H. & Rempel-Clower, N. Cortical structure predicts the pattern of corticocortical connections. *Cereb Cortex* **7**, 635-46 (1997).
6. Rempel-Clower, N.L. & Barbas, H. The laminar pattern of connections between prefrontal and anterior temporal cortices in the Rhesus monkey is related to cortical structure and function. *Cereb Cortex* **10**, 851-65 (2000).
7. Medalla, M. & Barbas, H. Specialized prefrontal "auditory fields": organization of primate prefrontal-temporal pathways. *Front Neurosci* **8**, 77 (2014).
8. Medalla, M. & Barbas, H. Diversity of laminar connections linking periarculate and lateral intraparietal areas depends on cortical structure. *Eur J Neurosci* **23**, 161-79 (2006).
9. Hilgetag, C.C. & Grant, S. Cytoarchitectural differences are a key determinant of laminar projection origins in the visual cortex. *Neuroimage* **51**, 1006-17 (2010).
10. Goulas, A., Uylings, H.B. & Stiers, P. Mapping the hierarchical layout of the structural network of the macaque prefrontal cortex. *Cereb Cortex* **24**, 1178-94 (2014).
11. Bastos, A.M. et al. Canonical microcircuits for predictive coding. *Neuron* **76**, 695-711 (2012).
12. Barone, P., Batardiere, A., Knoblauch, K. & Kennedy, H. Laminar distribution of neurons in extrastriate areas projecting to visual areas V1 and V4 correlates with the hierarchical rank and indicates the operation of a distance rule. *J Neurosci* **20**, 3263-81 (2000).
13. Ercsey-Ravasz, M. et al. A predictive network model of cerebral cortical connectivity based on a distance rule. *Neuron* **80**, 184-97 (2013).
14. Markov, N.T. et al. Anatomy of hierarchy: feedforward and feedback pathways in macaque visual cortex. *J Comp Neurol* **522**, 225-59 (2014).
15. Sanides, F. in *Advances in Primatology* (eds. Noback, C.H. & Montagna, W.) 137-208 (Appleton-Century-Crofts, New York, 1970).
